# Supplementary material for: Ultrastructure of Antennal Sensory Organs in Nine Flesh Flies (Diptera: Sarcophagidae): New Insight into the Definition of Family Sarcophagidae
Source: MDPI journal article supplement (doi:10.3390/insects13070602), 2022-06-30
Supplement: s1 [file s1]

# Ultrastructure of Antennal Sensory Organs in Nine Flesh Flies (Diptera: Sarcophagidae): New Insight into the Definition of Family Sarcophagidae

Wentian Xu <sup>1</sup>, Genting Liu <sup>1,2</sup>, Qike Wang <sup>2</sup>, Liping Yan <sup>1</sup>, Xianhui Liu <sup>3</sup>, Xinyu Li <sup>1</sup>, Thomas Pape <sup>4</sup>, and Dong Zhang <sup>1,\*</sup>

<sup>1</sup> School of Ecology and Nature Conservation, Beijing Forestry University, Qinghua East Road 35, Beijing 100083, China; [xuwt720@bjfu.edu.cn](mailto:xuwt720@bjfu.edu.cn) (W.X.); [gentingl@student.unimelb.edu.au](mailto:gentingl@student.unimelb.edu.au) (G.L.); [yanlp@bjfu.edu.cn](mailto:yanlp@bjfu.edu.cn) (L.Y.); [lixinyu91@cau.edu.cn](mailto:lixinyu91@cau.edu.cn) (X.L.)

<sup>2</sup> School of BioSciences, University of Melbourne, Melbourne, VIC 3010, Australia; [wangqike123@gmail.com](mailto:wangqike123@gmail.com)

<sup>3</sup> Department of Entomology and Nematology, University of California Davis, Davis, CA 95616, USA; [xhliu@ucdavis.edu](mailto:xhliu@ucdavis.edu)

<sup>4</sup> Natural History Museum of Denmark, Science Faculty, University of Copenhagen, Copenhagen, 2100, Denmark; [tpape@snm.ku.dk](mailto:tpape@snm.ku.dk)

\* Correspondence: [zhangdong\\_bjfu@bjfu.edu.cn](mailto:zhangdong_bjfu@bjfu.edu.cn)

# Supplementary File S1

## Comparison of antennal sensilla on the antennal postpedicel surface of sarcophagid flies and other Calyptrate flies.

BSS = bottle-shaped sensilla; SP = sensory pit; √ = identified; × = not identified; – = no data.

| Super family   | Family         | Subfamily          | Species                         | SP | BSS | Reference     |
|----------------|----------------|--------------------|---------------------------------|----|-----|---------------|
| Hippoboscoidea | Glossinidae    |                    | <i>Glossina palpalis</i>        | √  | ×   | 64            |
|                |                |                    | <i>Glossina tachinoides</i>     | √  | ×   |               |
|                | Hippoboscidae  |                    | <i>Lipoptena cervi</i>          | ×  | ×   | 52            |
|                |                |                    | <i>Lipoptena fortisetosa</i>    | ×  | ×   |               |
|                |                |                    | <i>Melophagus ovinus</i>        | √  | ×   | 65            |
|                |                |                    | <i>Hippobosca longipennis</i>   | √  | ×   |               |
|                |                |                    | <i>Hippobosca equina</i>        | √  | ×   |               |
| Muscoide grade | Fanniidae      |                    | <i>Fannia hirticeps</i>         | √  | ×   | 51            |
|                |                |                    | <i>Fannia scalaris</i>          | √  | ×   | 46            |
|                |                |                    | <i>Fannia canicularis</i>       | √  | ×   |               |
|                | Muscidae       |                    | <i>Musca domestica</i>          | √  | ×   | 45            |
|                |                |                    | <i>Hydrotaea irritans</i>       | √  | ×   | 66            |
|                |                |                    | <i>Hydrotaea chalcogaster</i>   | √  | ×   | 67            |
|                |                |                    | <i>Hydrotaea armipes</i>        | √  | ×   | 32            |
|                |                |                    | <i>Ophyra capensis</i>          | √  | ×   | 68            |
|                |                |                    | <i>Lispe neimongola</i>         | √  | ×   | 25            |
|                | Anthomyiidae   |                    | <i>Delia radicum</i>            | √  | ×   | 69            |
|                |                |                    | <i>Delia platura</i>            | √  | ×   |               |
|                |                |                    | <i>Delia floralis</i>           | √  | ×   | 29            |
|                |                |                    | <i>Delia antiqua</i>            | √  | ×   |               |
|                | Scathophagidae |                    | <i>Scathophaga stercoraria</i>  | √  | ×   | 55            |
| Oestriodea     | Sarcophagidae  | Sarcophaginae      | <i>Sarcophaga albiceps</i>      | √  | √   | Present study |
|                |                |                    | <i>Parasarcophaga dux</i>       | √  | —   | 30            |
|                |                |                    | <i>Sarcophaga portschinskyi</i> | √  | √   | Present study |
|                |                |                    | <i>Sarcophaga africa</i>        | √  | √   | Present study |
|                |                |                    | <i>Sarcophaga peregrina</i>     | √  | √   | Present study |
|                |                |                    | <i>Sarcophaga carnaria</i>      | √  | √   | 36            |
|                |                |                    | <i>Sarcophaga argyrostoma</i>   | √  | √   | 37            |
|                |                |                    | <i>Sarcophaga tibialis</i>      | √  | √   | 39            |
|                |                | Paramacronychiinae | <i>Wohlfahrtia bella</i>        | √  | √   | Present study |
|                |                |                    | <i>Wohlfahrtia magnifica</i>    | √  | √   | Present study |
|                |                |                    | <i>Agria mihalyii</i>           | √  | √   | Present study |
|                | Calliphoridae  | Miltogramminae     | <i>Metopia campestris</i>       | √  | √   | Present study |
|                |                |                    | <i>Mesomelena mesomelaena</i>   | √  | √   | Present study |
|                |                | Calliphorinae      | <i>Lucilia sericata</i>         | √  | ×   | 48            |
|                |                |                    | <i>Lucilia cuprina</i>          | √  | ×   | 70            |
|                |                |                    | <i>Phormia regina</i>           | √  | ×   | 71            |
|                |                |                    | <i>Protophormia terraenovae</i> | √  | ×   | 72            |
|                |                |                    | <i>Hemipyrellia ligurriens</i>  | √  | ×   | 73            |

|                  |                 |                                      |   |   |    |
|------------------|-----------------|--------------------------------------|---|---|----|
|                  |                 | <i>Chrysomya megacephala</i>         | √ | × |    |
|                  |                 | <i>Chrysomya rufifacies</i>          | √ | × | 74 |
|                  |                 | <i>Chrysomya nigripes</i>            | √ | × |    |
|                  |                 | <i>Chrysomya pinguis</i>             | √ | × | 74 |
|                  |                 | <i>Triceratopyga calliphoroides</i>  | √ | × | 75 |
| Mesembrinellidae |                 | <i>Mesembrinella bellardiana</i>     | √ | — |    |
|                  |                 | <i>Mesembrinella bicolor</i>         | √ | — | 76 |
|                  |                 | <i>Mesembrinella semihyalina</i>     | √ | — |    |
| Tachinidae       | Exoristinae     | <i>Pales pavidus</i>                 | √ | × | 54 |
|                  |                 | <i>Pseudoperichaeta nigrolineata</i> | √ | × | 77 |
|                  | Phasiinae       | <i>Gymnosoma rotundatum</i>          | √ | × | 78 |
|                  |                 | <i>Trichopoda pennipes</i> F.        | √ | × | 79 |
|                  |                 |                                      |   |   |    |
| Oestridae        | Oestrinae       | <i>Rhinoestrus purpureus</i>         | √ | × | 53 |
|                  |                 | <i>Oestrus ovis</i>                  | √ | × | 80 |
|                  | Hypodermatinae  | <i>Hypoderma lineatum</i>            | √ | × | 81 |
|                  |                 | <i>Hypoderma bovis</i>               | √ | × | 50 |
|                  |                 | <i>Portschinskia magnifica</i>       | × | × | 24 |
|                  |                 |                                      |   |   |    |
|                  | Gasterophilinae | <i>Gasterophilus nigricornis</i>     | √ | × | 23 |
|                  |                 | <i>Gasterophilus pecorum</i>         | √ | × | 49 |
|                  |                 | <i>Gasterophilus nasalis</i>         | √ | × | 49 |
|                  |                 | <i>Gasterophilus intestinalis</i>    | √ | × | 49 |
|                  |                 | <i>Gasterophilus haemorrhoidalis</i> | √ | × | 49 |
